# Supplementary material for: FLT3 mutation-related immune checkpoint molecule absent in melanoma 2 (AIM2) contributes to immune infiltration in pediatric and adult acute myeloid leukemia: evidence from bioinformatics analysis
Source: PubMed Central journal article supplement — Transl Cancer Res. 2024 Nov 27;13(11):6255–72. doi: 10.21037/tcr-24-1403 (PMC11651761; doi:10.21037/tcr-24-1403), 2024-11-27
Supplement: tcr-13-11-6255-supplementary.pdf [file tcr-13-11-6255-supplementary.pdf]

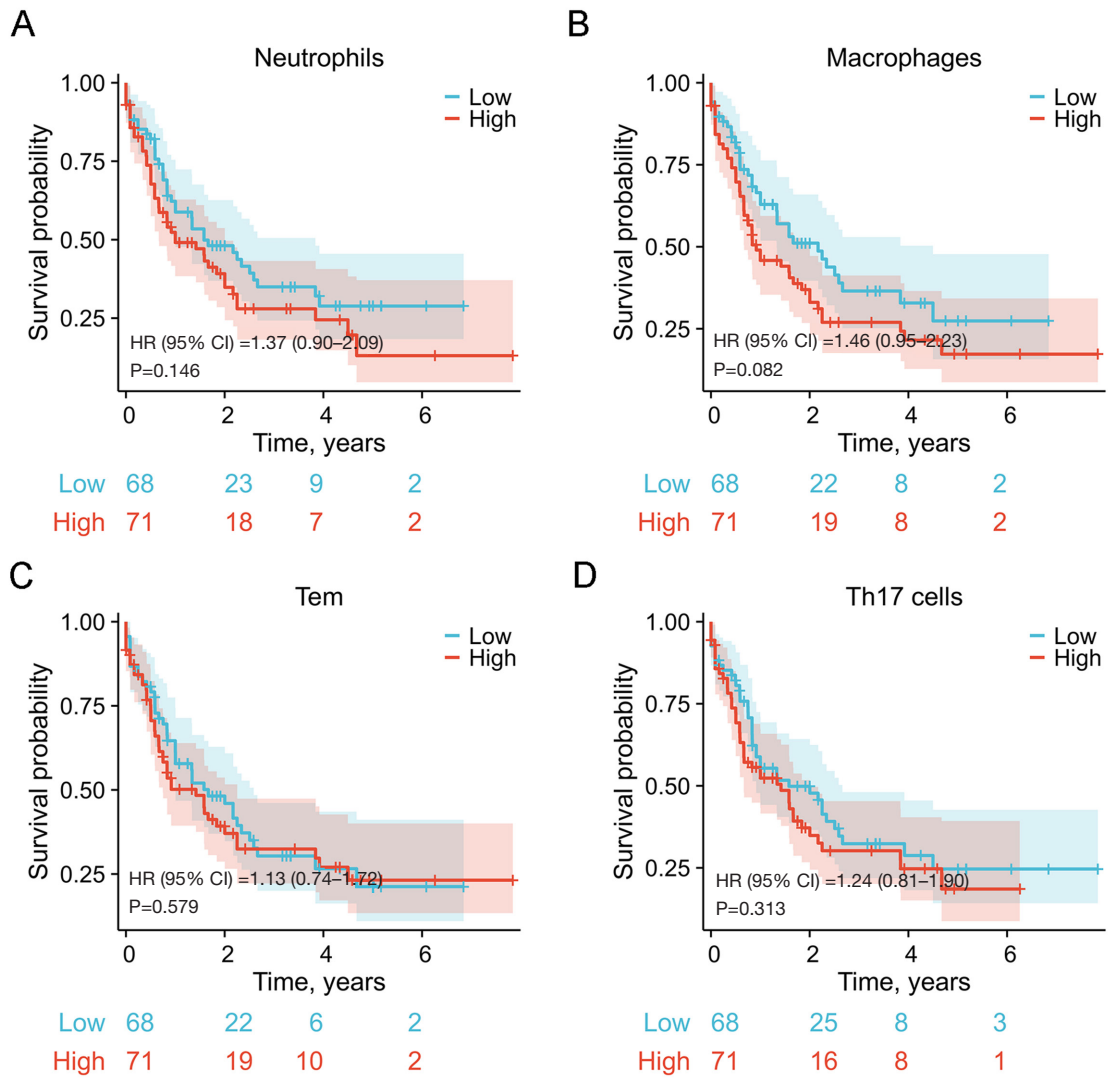

**Figure S1** The correlation of immune cell enrichment score with OS of AML patients. Immune cell enrichment scores with ssGSEA algorithm were used to evaluate the correlation of neutrophils (A), macrophages (B), Tem (C), and Th17 cells (D) with OS. HR, hazard ratio; CI, confidence interval; Tem, effector memory T cells; Th, T helper; OS, overall survival; AML, acute myeloid leukemia; ssGSEA, single-sample gene set enrichment analysis.
